# Supplementary material
Source: publisher site journal article supplement (https://www.dovepress.com/article/446313)
Supplement: Supplementary file 1 [file get_supplementary_file.php]

**Supplementary figures and their legends**

**
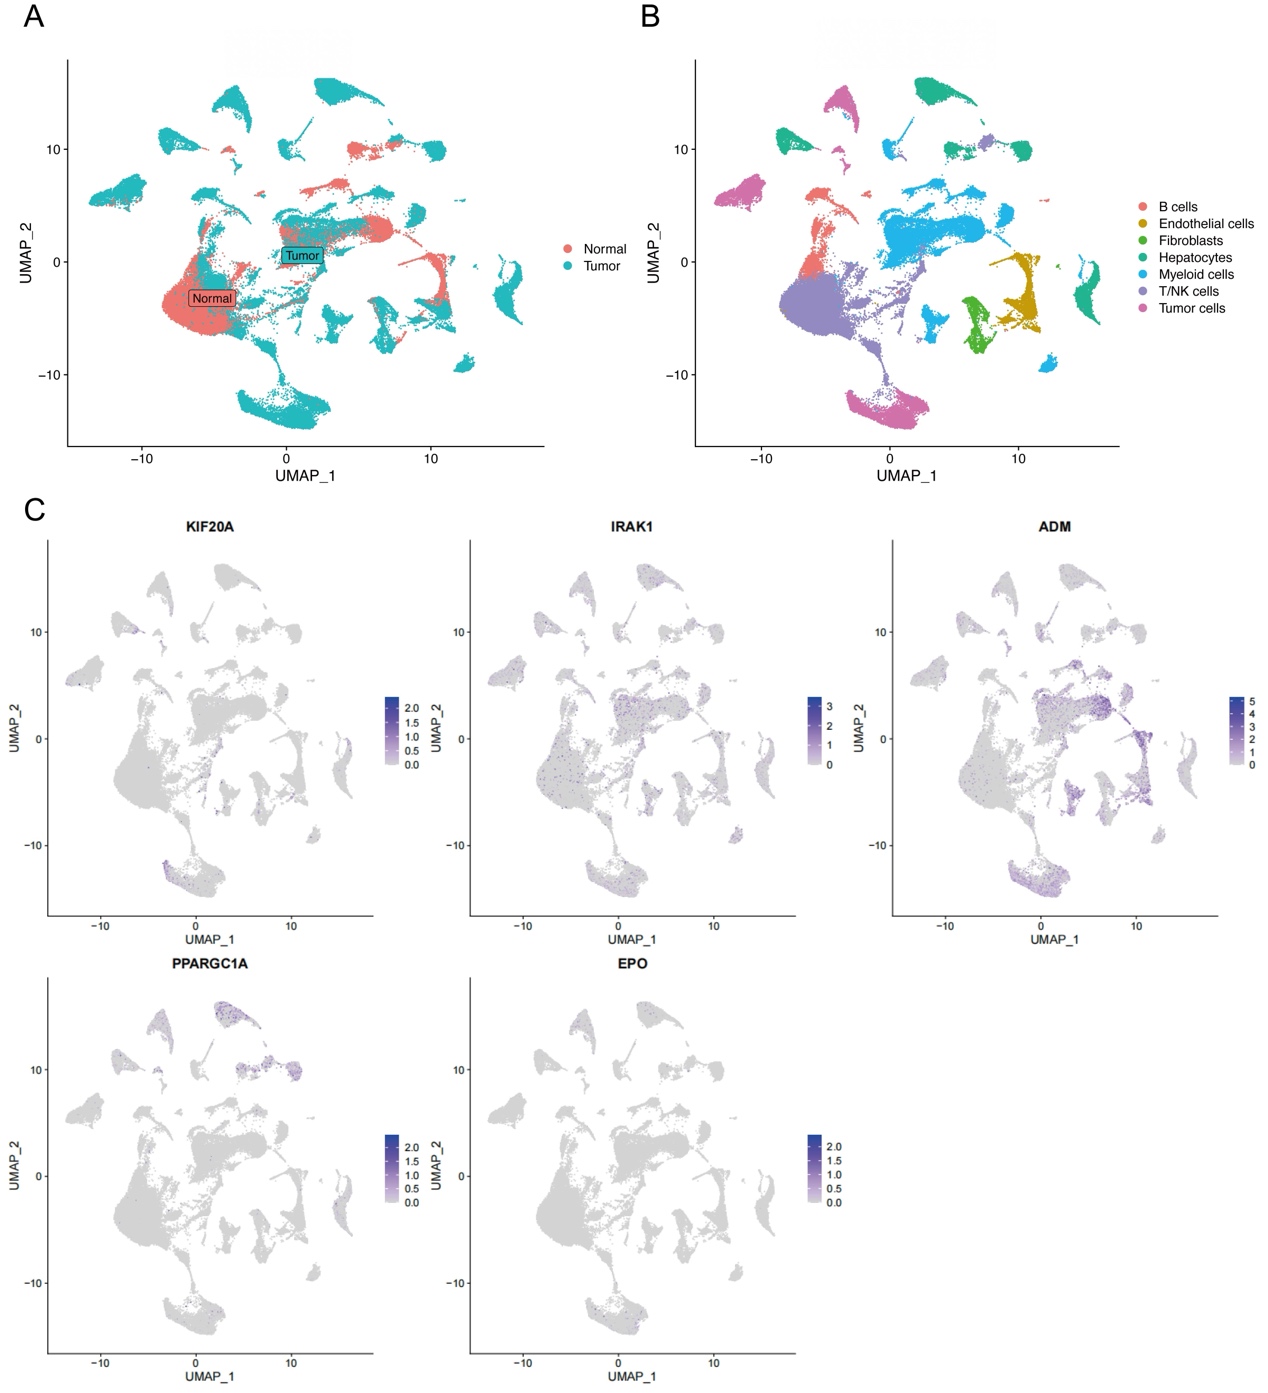
**

**Figure S1** Expression of the five differentially expressed hypoxia- and lactate metabolism-related genes in GSE149614 cohort. (A, B) Uniform manifold approximation and projection (UMAP) plots of single-cell RNA sequencing. (C) Expression of KIF20A, IRAK1, ADM, PPARGC1A and EPO.


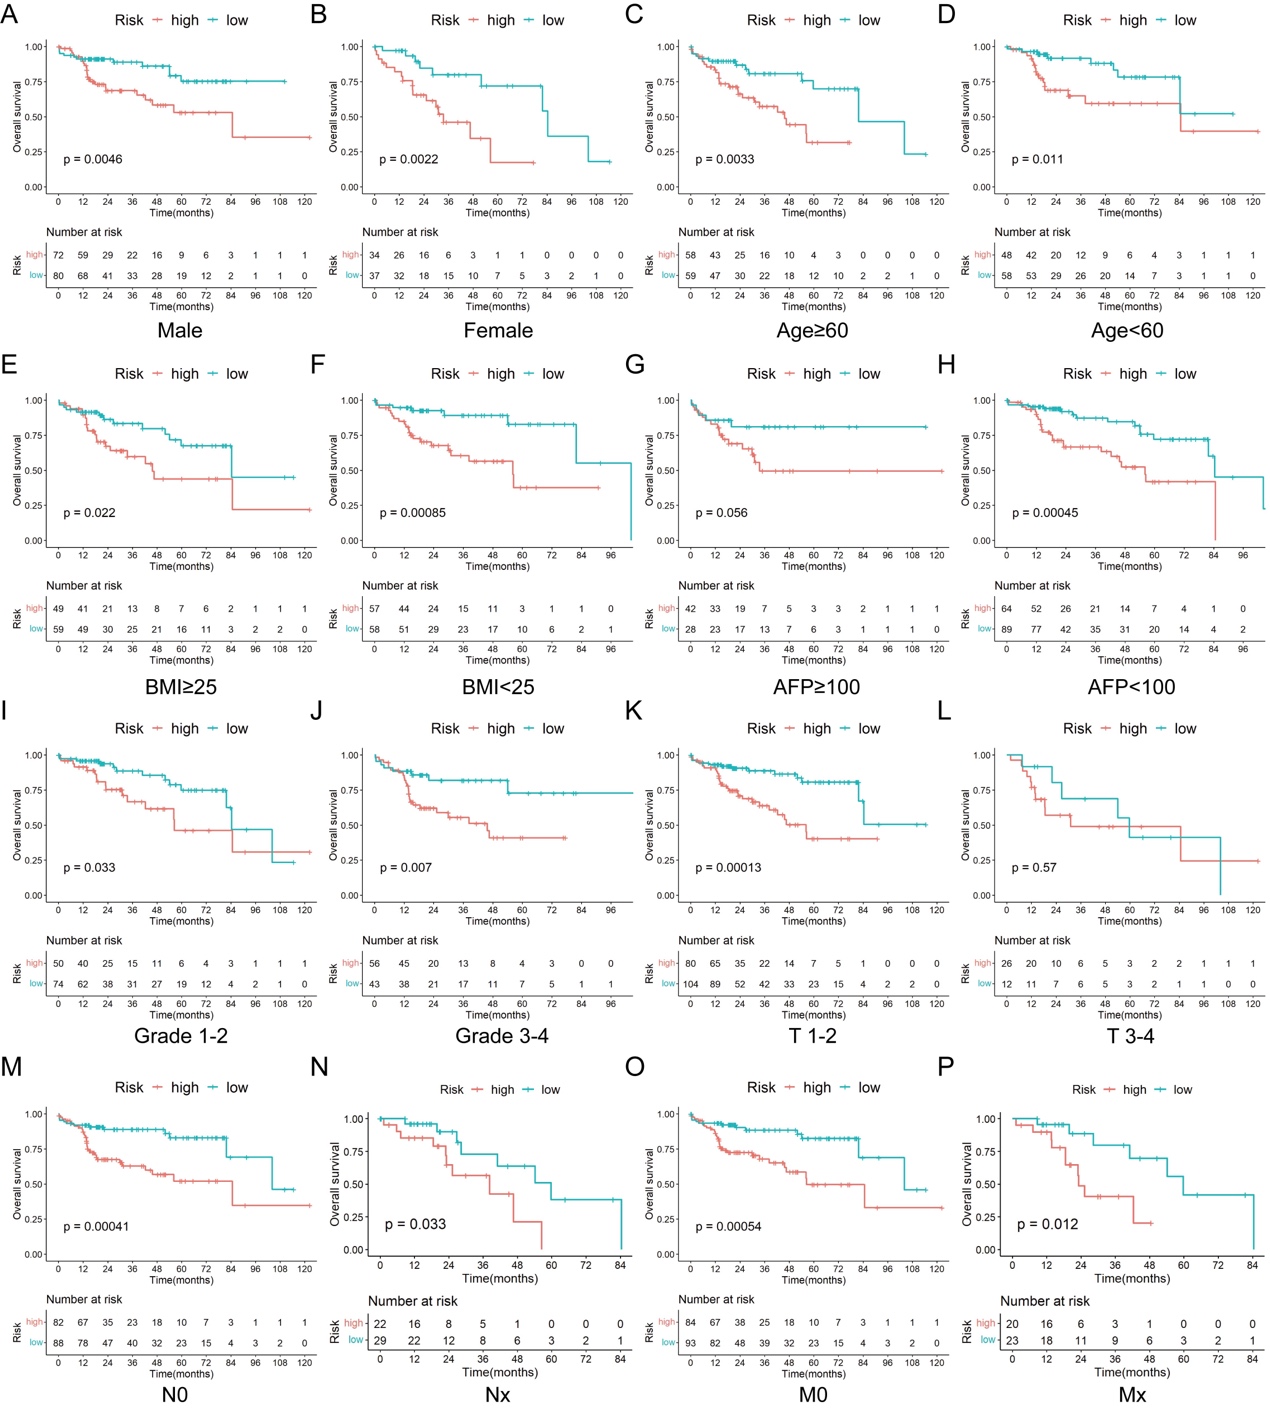


**Figure S2** KM survival analysis between the two risk groups in subgroups stratified by clinical characteristics. (A) Male. (B) Female. (C) Age ≥ 60 years. (D) Age < 60 years. (E) BMI ≥ 25. (F) BMI < 25. (G) AFP ≥ 100. (H) AFP < 100. (I) Grade 1-2. (J) Grade 3-4. (K) T 1-2. (L) T 3-4. (M) N0. (N) Nx. (O) M0. (P) Mx.


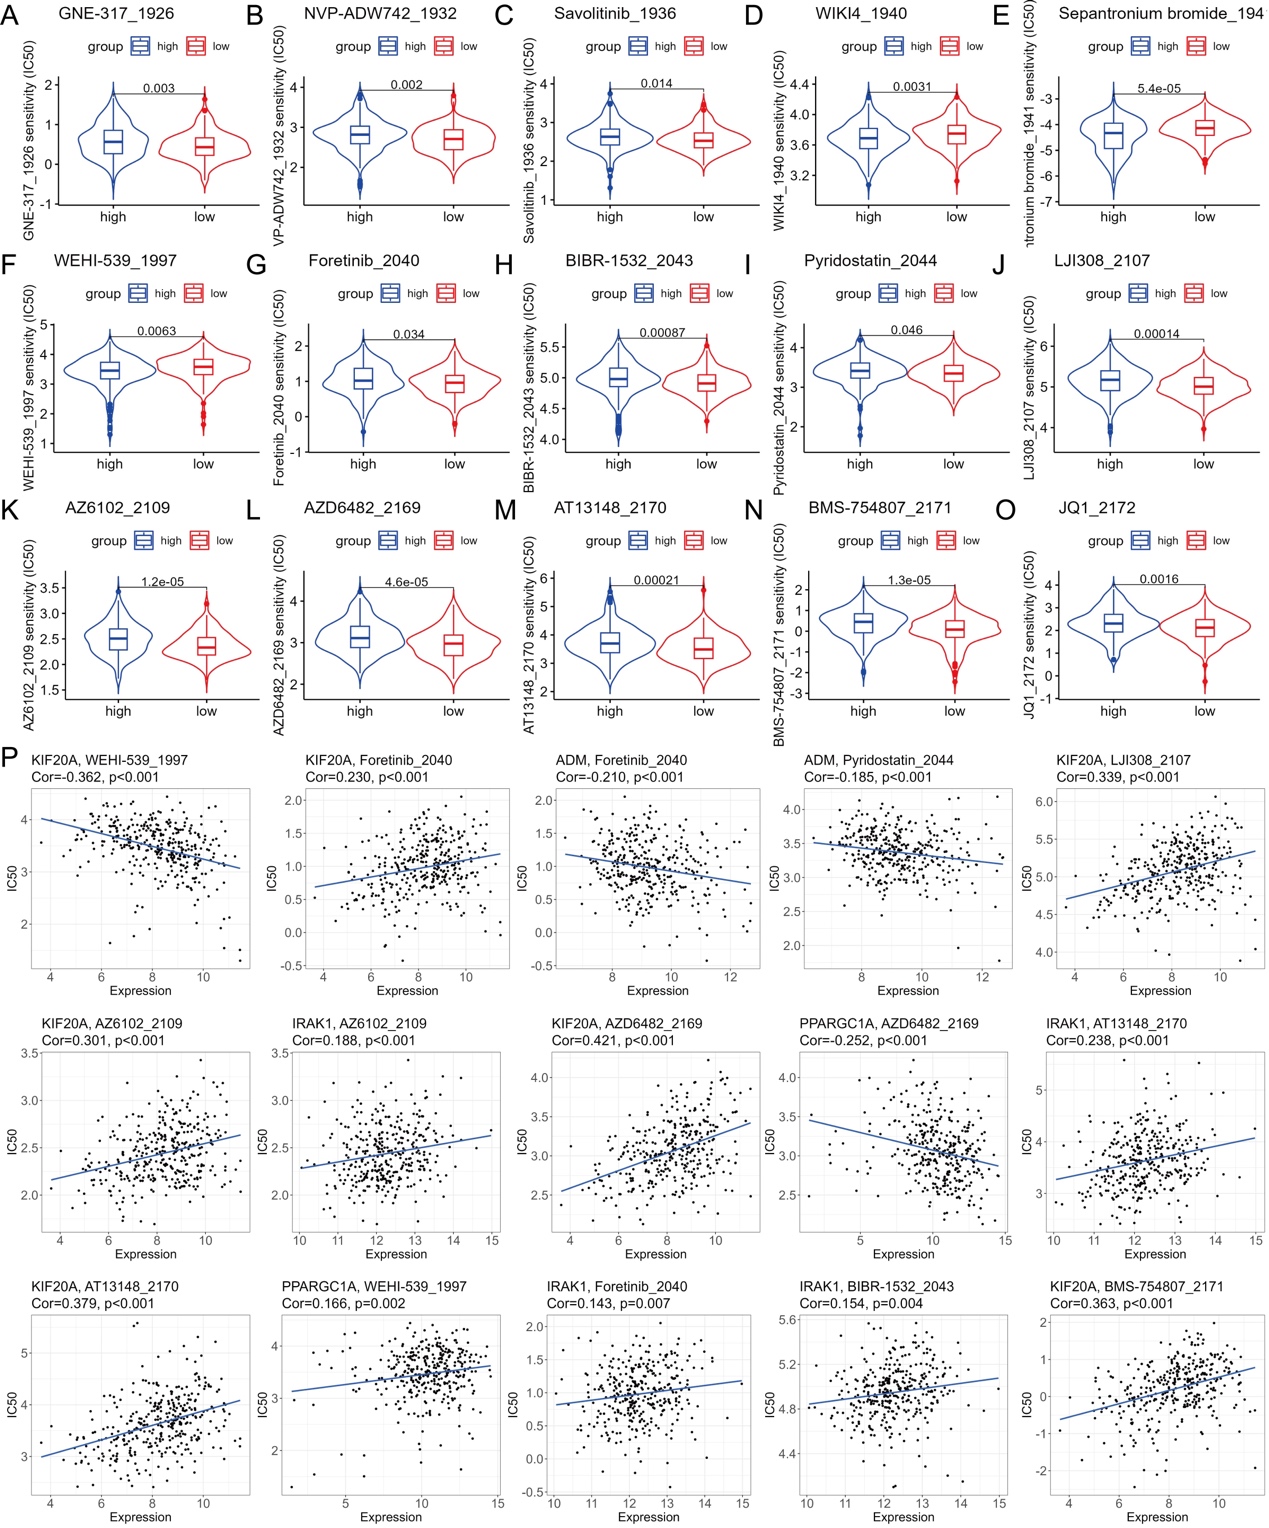


**Figure S3** The assessment of the response to systemic therapeutic agents. (A-O) Comparison of the IC50 values of chemotherapeutic agents in two risk groups, including GNE-317, NVP-ADW72, savolitinib, WEHI-539, WIIKI4, sepantronium bromide, foretinib, BIBR-1532, pyridostatin, BMS-754807, LJI308, AZ6102, AZD6482, AT13148 and JQ1. (P) The correlation between IC50 values of chemotherapeutic agents and expression of HLRGs. Cor, correlation coefficient.

**Supplementary Tables and their legends**

**Table S1** The primer sequences used in the study.

| mRNA | Forward primer (5′-3′) | Reverse primer (5′-3′) |
| --- | --- | --- |
| KIF-20A | 5'‐TGCTGTCCGATGACGATGTC‐3' | 5'‐AGGTTCTTGCGTACCACAGAC‐3' |
| IRAK1 | 5'‐GCACCCACAACTTCTCGGAG‐3' | 5'‐CACCGTGTTCCTCATCACCG‐3' |
| ADM | 5'‐CCGAGTGTTTGCCAGGCTTA‐3' | 5'‐GGTGACACGCCGTGAGAAAT‐3' |
| PPARGC1A | 5'‐TCTGAGTCTGTATGGAGTGACAT‐3' | 5'‐CCAAGTCGTTCACATCTAGTTCA‐3' |
| EPO | 5'‐GGAGGCCGAGAATATCACGAC‐3' | 5'‐CCCTGCCAGACTTCTACGG‐3' |
| ACTIN | 5'‐CACCATTGGCAATGAGCGGTTC‐3' | 5'‐AGGTCTTTGCGGATGTCCACGT‐3' |
